# Supplementary material for: The high-accuracy prediction of carbon content in semi-coke by laser-induced breakdown spectroscopy
Source: Royal Society of Chemistry journal article supplement (doi:10.1039/c9ja00443b), 2020-01-01
Supplement: c9ja00443b1.pdf [file c9ja00443b1.pdf]

## Supporting Information

### High-accuracy prediction of carbon content in semi-coke by laser-induced breakdown spectroscopy

Xiangjun Xu, Angze Li, Xianshuang Wang, Chunjie Ding, Suling Qiu, Yage He, Tianqi Lu, Feng He, Bingsuo Zou and Ruibin Liu\*

*Beijing Key Lab of Nanophotonics and Ultrafine Optoelectronic Systems, School of Physics, Beijing Institute of Technology, Beijing 100081, China.*

*E-mail: liusir@bit.edu.cn;*

1. The concentration ratio and type of binder are critical for sample pretreatment. Here, the optimal concentration of binder at around 50% are utilized, then the semi-coke powder is mixed with variety binders for pressing test. The pressing test results of different kinds of binders are listed in Table 1. Only when the weight of semi-coke is 0.3 g, KF, KBr, and KCl are each 0.1 g, the semi-coke powder are easily pressed into a slice, other ratios of binders are hard to be pressed as coal slice. Therefore, the mixture weight is designed to be 0.6 g for one sample and the binder of KF, KCl, and KBr is designed to be 0.1g respectively.

**Table 1. The pressing test results of different kinds of binders.**

| Number of experiments           | 1   | 2   | 3   | 4    | 5    | 6    | 7   |
|---------------------------------|-----|-----|-----|------|------|------|-----|
| semi-coke (g)                   | 0.3 | 0.3 | 0.3 | 0.3  | 0.3  | 0.3  | 0.3 |
| KF (g)                          | 0.3 | 0   | 0   | 0.15 | 0    | 0.15 | 0.1 |
| KCl (g)                         | 0   | 0.3 | 0   | 0.15 | 0.15 | 0    | 0.1 |
| KBr (g)                         | 0   | 0   | 0.3 | 0    | 0.15 | 0.15 | 0.1 |
| Whether it is pressed to slice. | No  | No  | No  | No   | No   | No   | Yes |

2. Photographic images of sample, (a) the pressed coal slice with diameter 30mm with the binder assistance and (b) the double-sided tapes after painting the sample powder evenly on the surface.

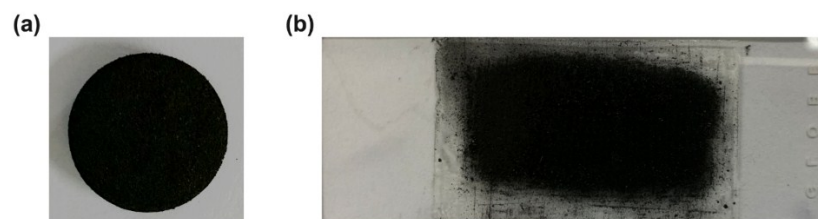

Fig. 1 (a) One typical coal slice of semi-coke sample with binder added. (b)The double-sided tape painted evenly with semi-coke powder.

3. As shown in Fig. 2, the temperature is fitted using four emission lines of Ca, and the correlation coefficient  $R^2=0.989$ . For the 200 measurements, the correlation coefficient of the fitting is greater than 0.98, indicating the accuracy of the method is enough high.

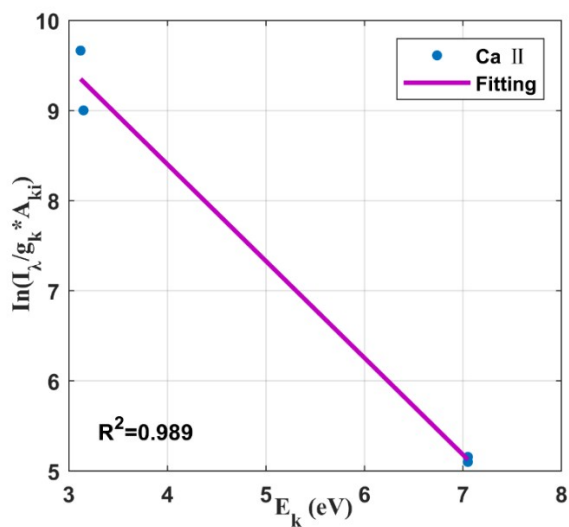

Fig. 2 Boltzmann plot method to fit plasma temperature

4. The spectral stability of the semi-coke sample from these two pretreatment methods is quite different. As shown in Fig. 3, the average RSD of the characteristic peaks are 12.1% and 16.2%, respectively, indicating that the easy way with painting sample on tape exist measurement and prediction uncertainties.

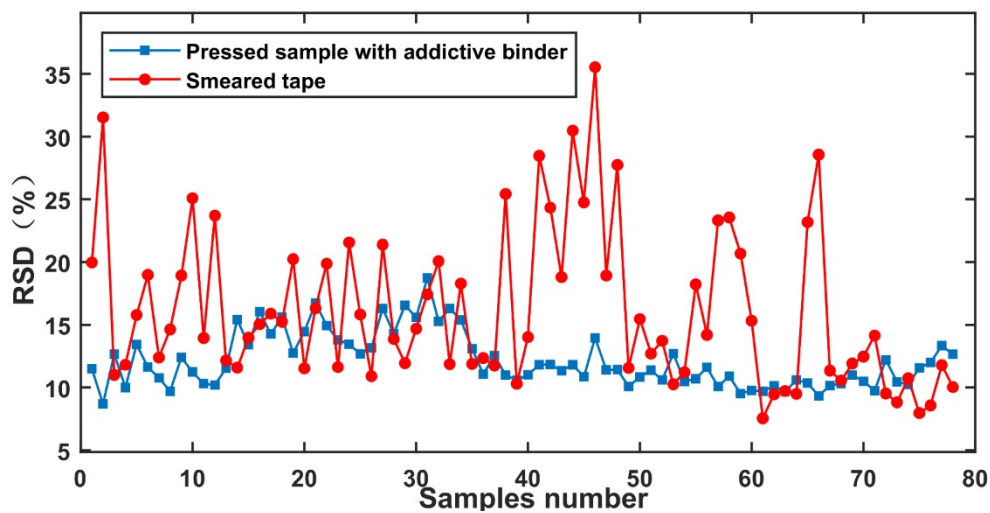

Fig. 3 RSD from C (I) 193.09 nm under different samples under various treatments
